# Supplementary material for: Spatiotemporal Patterns of Light Pollution on the Tibetan Plateau over Three Decades at Multiple Scales: Implications for Conservation of Natural Habitats
Source: MDPI journal article supplement (doi:10.3390/rs14225755), 2022-11-14
Supplement: s1 [file s1]

## Supplement

**Table S1.** Landscape index of light pollution area on the TP from 1992 to 2018.

| Year | TA (10 <sup>-3</sup> ) | PD (10 <sup>-3</sup> ) | LPI    | LSI   | AI    |
|------|------------------------|------------------------|--------|-------|-------|
| 1992 | 1.16                   | 0.0156                 | 0.0918 | 6.62  | 82.79 |
| 1995 | 1.68                   | 0.0206                 | 0.1218 | 7.39  | 83.86 |
| 2000 | 3.75                   | 0.0412                 | 0.2479 | 11.02 | 83.27 |
| 2005 | 8.89                   | 0.0805                 | 0.6673 | 15.84 | 84.06 |
| 2010 | 13.54                  | 0.1160                 | 0.8860 | 19.14 | 84.26 |
| 2015 | 45.23                  | 0.2455                 | 1.9693 | 28.96 | 86.77 |
| 2018 | 82.82                  | 0.3840                 | 4.0623 | 36.50 | 87.61 |

**Table S2.** Threatened species whose habitats are affected by light pollution by more than 25% (inclusive).

| Species | Scientific Name      | Category | Species Habitat Area (km <sup>2</sup> ) | Light Pollution Area in 1992 (km <sup>2</sup> ) | The Proportion of Light Pollution Area in 1992 (%) | Light Pollution Area in 2018 (km <sup>2</sup> ) | The Proportion of Light Pollution Area in 2018 (%) |
|---------|----------------------|----------|-----------------------------------------|-------------------------------------------------|----------------------------------------------------|-------------------------------------------------|----------------------------------------------------|
| Mammals | Shaggy               | EN       | 34.79                                   | 0                                               | 0                                                  | 33.14                                           | 95.26                                              |
|         | river otter          | VU       | 187.21                                  | 0                                               | 0                                                  | 107.63                                          | 57.49                                              |
|         | Asian elephant       | EN       | 5705.71                                 | 0                                               | 0                                                  | 1672.43                                         | 29.31                                              |
| Birds   | Dauphin              | VU       | 1608.17                                 | 0                                               | 0                                                  | 808.49                                          | 50.27                                              |
|         | Assam's quail        | EN       | 3554.46                                 | 0                                               | 0                                                  | 1432.01                                         | 40.29                                              |
|         | Swamp cuckoo         | VU       | 1327.25                                 | 0                                               | 0                                                  | 451.65                                          | 34.03                                              |
|         | Great bald Stork     | EN       | 4324.81                                 | 0                                               | 0                                                  | 1407.04                                         | 32.53                                              |
|         | Bawd                 | CR       | 2845.05                                 | 0                                               | 0                                                  | 870.95                                          | 30.61                                              |
|         | Wrinkled hornbill    | VU       | 9144.81                                 | 0                                               | 0                                                  | 2639.48                                         | 28.86                                              |
|         | Swamp partridge      | VU       | 6693.07                                 | 0                                               | 0                                                  | 1740.80                                         | 26.01                                              |
|         | Red-necked crane     | VU       | 9028.47                                 | 0                                               | 0                                                  | 2313.25                                         | 25.62                                              |
|         | Spotted eagle        | VU       | 42.25                                   | 0                                               | 0                                                  | 10.66                                           | 25.24                                              |
|         | Geoclemys hamiltonii | EN       | 2427.42                                 | 0                                               | 0                                                  | 754.60                                          | 31.09                                              |

**Table S3.** Near threatened species whose habitats are affected by light pollution by more than 25% (inclusive).

| Species | Scientific Name    | Category | Species Habitat Area (km <sup>2</sup> ) | Light Pollution Area in 1992 (km <sup>2</sup> ) | The Proportion of Light Pollution Area in 1992 (%) | Light Pollution Area in 2018 (km <sup>2</sup> ) | The Proportion of Light Pollution Area in 2018 (%) |
|---------|--------------------|----------|-----------------------------------------|-------------------------------------------------|----------------------------------------------------|-------------------------------------------------|----------------------------------------------------|
| Birds   | White crested ibis | NT       | 5.04                                    | 0                                               | 0                                                  | 4.01                                            | 79.63                                              |
|         | Big grass warbler  | NT       | 1935.68                                 | 0                                               | 0                                                  | 980.47                                          | 50.65                                              |
|         | Dariae             | NT       | 4757.22                                 | 0                                               | 0                                                  | 1738.12                                         | 36.54                                              |
|         | Black-belly snake  | NT       | 3257.22                                 |                                                 |                                                    | 1094.21                                         | 33.59                                              |
|         | Black-necked stork | NT       | 6187.51                                 | 0                                               | 0                                                  | 1905.53                                         | 30.80                                              |

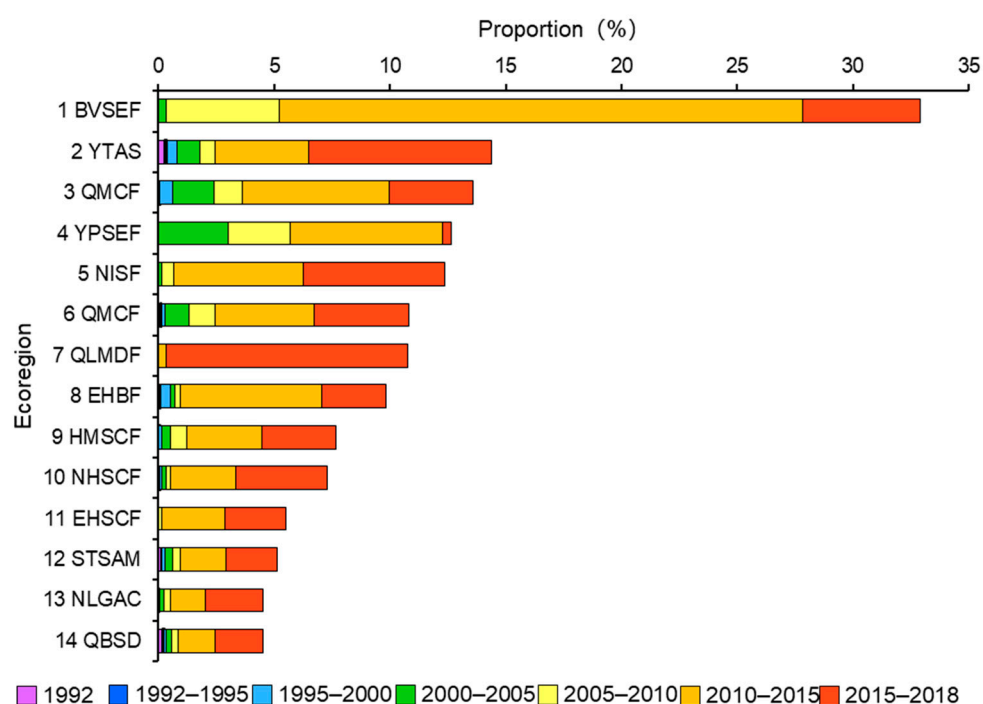

| NO. | Abbreviation | Ecoregion                                               |
|-----|--------------|---------------------------------------------------------|
| 1   | BVSEF        | Brahmaputra Valley semievergreen forests                |
| 2   | YTAS         | Yarlung Tsangpo arid steppe                             |
| 3   | QMCF         | Qionglai-Minshan conifer forests                        |
| 4   | YPSEF        | Yunnan Plateau subtropical evergreen forests            |
| 5   | NISF         | Northern Indochina subtropical forests                  |
| 6   | QMCF         | Qilian Mountains conifer forests                        |
| 7   | QLMDF        | Qin Ling Mountains deciduous forests                    |
| 8   | EHBf         | Eastern Himalayan broadleaf forests                     |
| 9   | HMSCF        | Hengduan Mountains subalpine conifer forests            |
| 10  | NHSCF        | Northeastern Himalayan subalpine conifer forests        |
| 11  | EHSCF        | Eastern Himalayan subalpine conifer forests             |
| 12  | STSAM        | Southeast Tibet shrublands and meadows                  |
| 13  | NLGAC        | Nujiang Langcang Gorge alpine conifer and mixed forests |
| 14  | QBSD         | Qaidam Basin semidesert                                 |

**Figure S1.** Light pollution at the ecoregional scale. Only the ecoregions whose total light pollution range is above the average level of light pollution on the TP are listed. The abbreviations of the 14 ecoregions are shown in the table below.

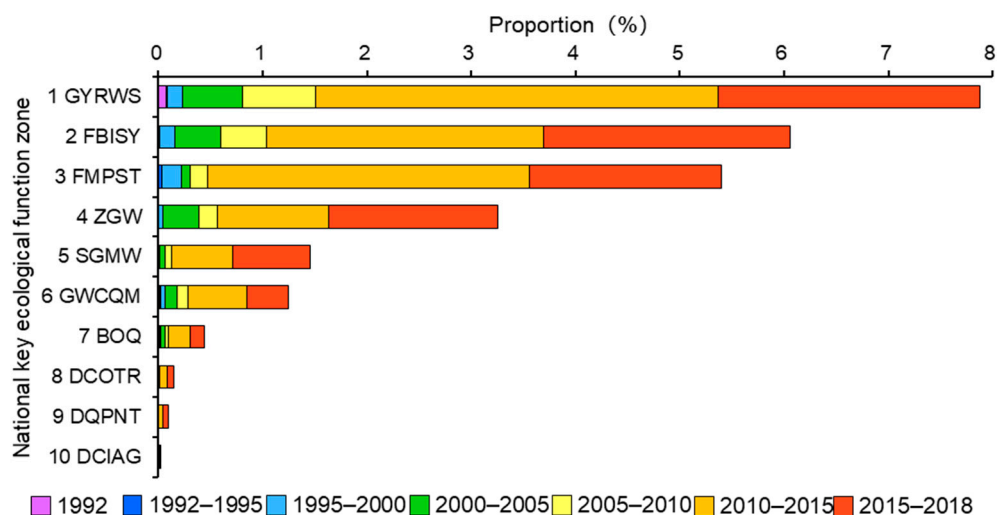

| NO. | Abbreviation | National Key Ecological Function Area                  |
|-----|--------------|--------------------------------------------------------|
| 1   | GYRWS        | Gannan Yellow River water supply                       |
| 2   | FBISY        | Forest and biodiversity in Sichuan and Yunnan          |
| 3   | FMPST        | Forest at the margin of the plateau in southeast Tibet |
| 4   | ZGW          | Zoige Grassland Wetland                                |
| 5   | SGMW         | Sanjiangyuan Grassland Meadow Wetland                  |
| 6   | GWCQM        | Glaciers and water conservation in the Qilian Mountain |
| 7   | BOQ          | Biodiversity of Qinba                                  |
| 8   | DCOTR        | Desertification control of Tarim River                 |
| 9   | DQPNT        | Desert of Qiangtang Plateau in Northwest Tibet         |
| 10  | DCIAG        | Desertification control in Altun Grassland             |

**Figure S2.** Light pollution at the scale of national key ecological function zone. The abbreviations of the national key ecological function zones are shown in the table below.

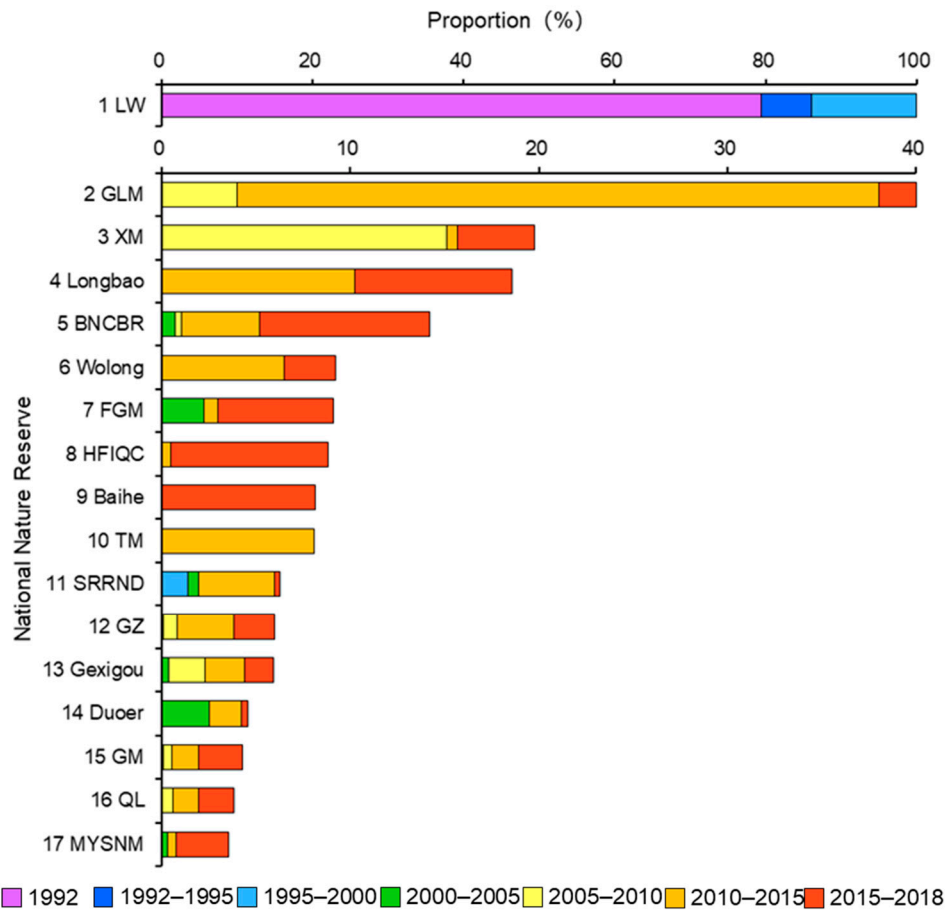

| NO. | Abbreviation | National Natural Reserve                           |
|-----|--------------|----------------------------------------------------|
| 1   | LW           | Lalu Wetland                                       |
| 2   | GLM          | Gansu Lianhua Mountain                             |
| 3   | XM           | Xunhua Mengda                                      |
| 4   | Longbao      | Longbao                                            |
| 5   | BNCBR        | Black-necked crane of Brahmaputra River            |
| 6   | Wolong       | Wolong                                             |
| 7   | FGM          | Four Girls Mountain                                |
| 8   | HFIQC        | Haloxylon forest in Qinghai-chaidam                |
| 9   | Baihe        | Baihe                                              |
| 10  | TM           | Taizi mountains                                    |
| 11  | SRRND        | The source region of rivers in the north of Datong |
| 12  | GZ           | Gahai-zecha                                        |
| 13  | Gexigou      | Gexigou                                            |
| 14  | Duoer        | Duoer                                              |
| 15  | GM           | Gongga Mountain                                    |
| 16  | QL           | Qinghai Lake                                       |
| 17  | MYSNM        | Mangkang Yunnan snub-nosed monkey                  |

**Figure S3.** Light pollution at the scale of national nature reserve. The abbreviations of the national nature reserves are shown in the table below.

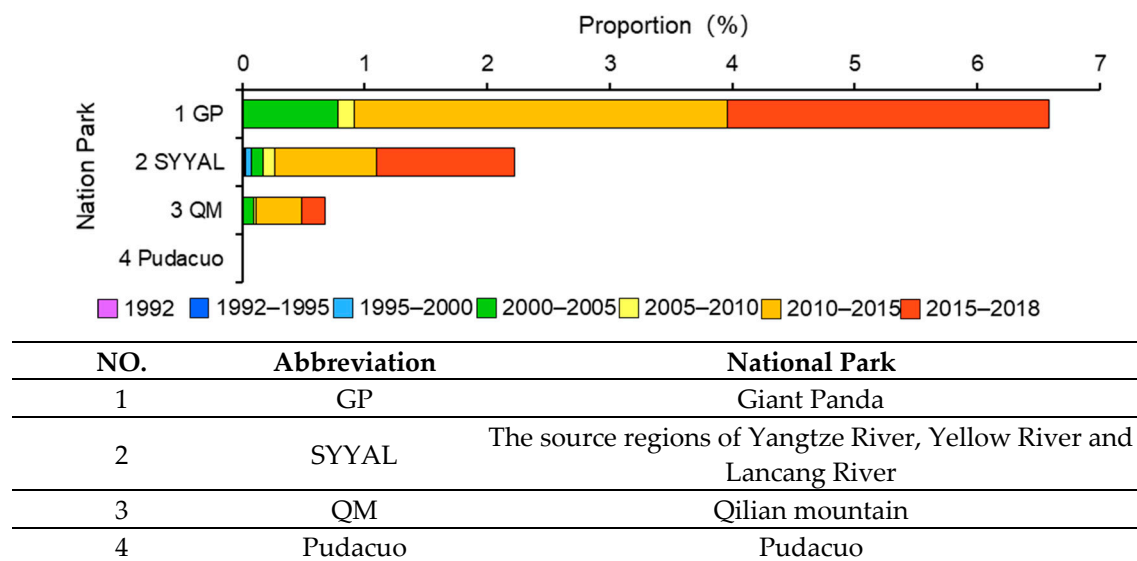

**Figure S4.** Light pollution at the national park scale. The abbreviations of the national parks are shown in the table below.
